# Supplementary material for: A genetic ensemble approach for gene-gene interaction identification
Source: Springer Nature journal article supplement (doi:10.1186/1471-2105-11-524), 2010-10-21

SNP selection

Combinatorial ranking

Evaluation

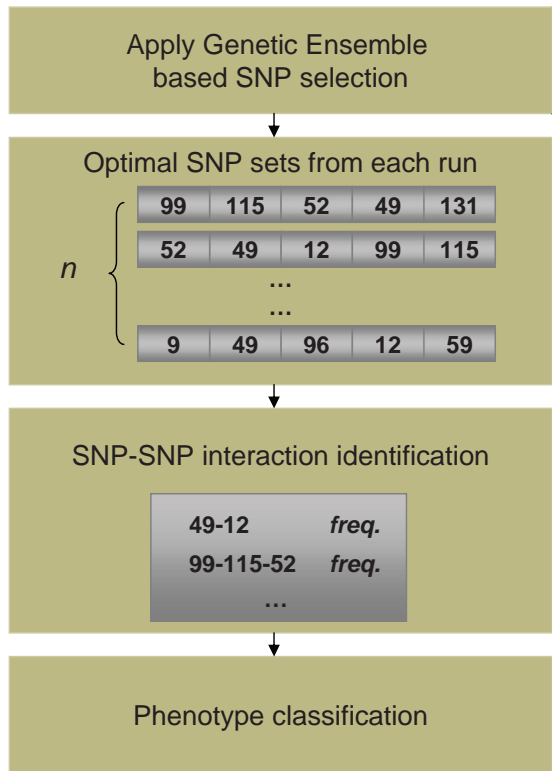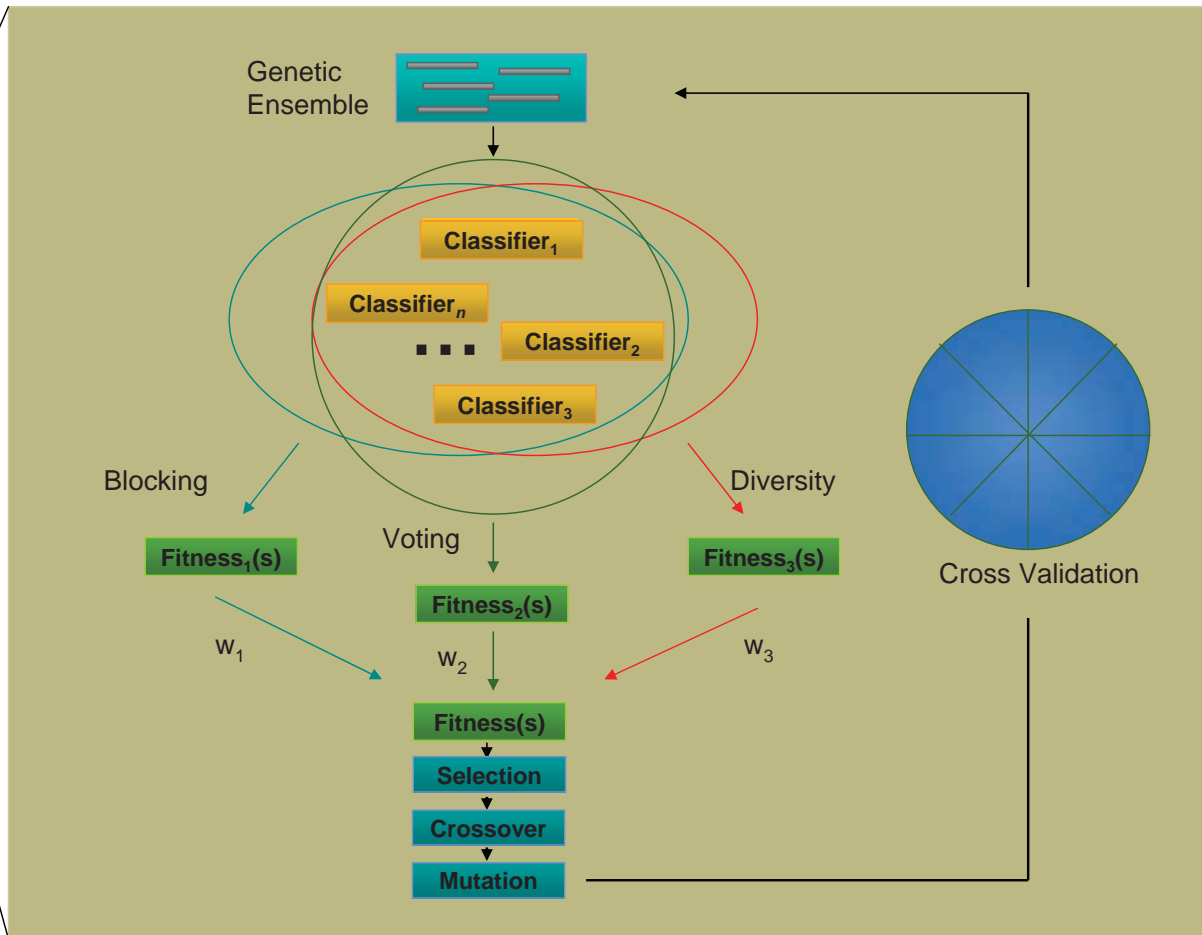

Supplement: 12859_2009_4107_MOESM1_ESM.pdf [file 12859_2009_4107_MOESM1_ESM.pdf]
